# Supplementary material for: Micrometer-sized gold nanoplates: starch-mediated photochemical reduction synthesis and possibility of application to tip-enhanced Raman scattering (TERS)
Source: Royal Society of Chemistry journal article supplement (doi:10.1039/c2cp40330g), 2012-01-01
Supplement: c2cp40330g.pdf [file c2cp40330g.pdf]

## Electronic Supplementary Information (ESI):

### Micrometer-Sized Gold Nanoplates: Starch-Mediated Photochemical Reduction Synthesis and Possibility of Application to Tip-Enhanced Raman Scattering (TERS)

Prompong Pienpinijtham,<sup>a,b</sup> Xiao Xia Han,<sup>a</sup> Toshiaki Suzuki,<sup>a</sup> Chuchaat Thammacharoen,<sup>b</sup> Sanong Ekgasit,<sup>b,\*</sup> and Yukihiro Ozaki<sup>a,\*</sup>

<sup>a</sup>*Department of Chemistry, School of Science and Technology, Kwansai Gakuin University, Sanda, Hyogo 669-1337, Japan*

<sup>b</sup>*Sensor Research Unit, Department of Chemistry, Faculty of Science, Chulalongkorn University, Bangkok 10330, Thailand*

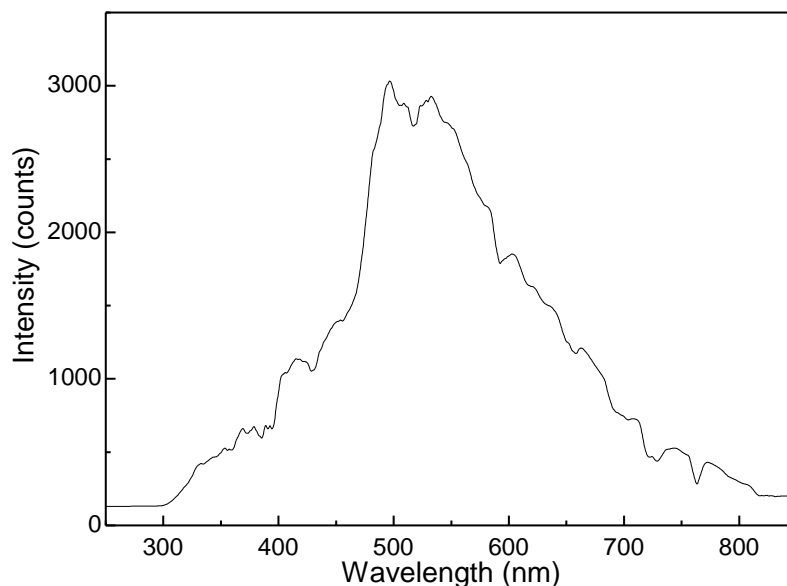

**Fig. S1** UV-visible spectrum of sunlight. The spectrum was collected by a fiber-optic portable UV/visible spectrometer (USB2000 UV/visible spectrometer, Ocean Optics). The integration time was 30 ms with 128 accumulation numbers, and the diameter of fiber-optic was 600  $\mu\text{m}$ . A fiber-optic was pointed directly to the sun for collecting an energy profile.

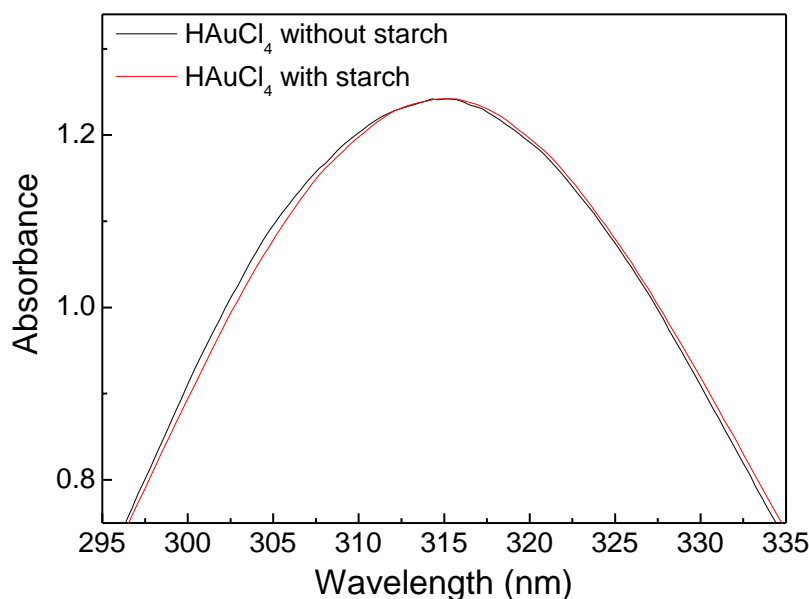

Fig. S2 UV-visible spectra of gold ion mixtures (0.2 M HCl 5 mL + 200 ppm HAuCl<sub>4</sub> (pH 7) 10 mL) in the presence and absence of starch.

The spectrum of gold ion in the presence of starch reveals a small red-shift at the band of charge transfer from Cl<sup>-</sup> to Au<sup>3+</sup> center in AuCl<sub>4</sub><sup>-</sup> (around 315 nm in spectrum) compared to that in the absence of starch. It indicates that the interaction between Cl<sup>-</sup> and Au<sup>3+</sup> in AuCl<sub>4</sub><sup>-</sup> was disturbed and weakened. This red-shift can also be implied that the complex of [Au(III)Cl<sub>4</sub><sup>-</sup>-starch] was formed. However, we cannot confirm the occurrence of [Au(II)Cl<sub>3</sub><sup>-</sup>-starch] and [Au(I)Cl<sub>2</sub><sup>-</sup>-starch] by ourselves. Fortunately, there were many works that discussed and proposed about the mechanism of photochemical reduction. The process of reduction from Au(III)Cl<sub>4</sub><sup>-</sup> to Au(II)Cl<sub>3</sub><sup>-</sup> and Au(I)Cl<sub>2</sub><sup>-</sup> via photoreduction and disproportionation is widely accepted.<sup>1,2</sup> Therefore, the evidence of [Au(III)Cl<sub>4</sub><sup>-</sup>-starch] combined with the reports about the existence of Au(II)Cl<sub>3</sub><sup>-</sup> and Au(I)Cl<sub>2</sub><sup>-</sup> are confidential that starch-mediated photochemical reduction really happens.

### **Reference**

- 1 S. Eustis, H.-Y. Hsu, M. A. El-Sayed, *J. Phys. Chem. B*, 2005, 109, 4811–4815.
- 2 S. Dong, C. Tang, H. Zhou, H. Zhao, *Gold Bull.*, 2004, 37, 187–195.

**Table S1** Raman band assignment for crystal violet.<sup>3</sup>

| <b>Raman shift (cm<sup>-1</sup>)</b> | <b>Raman band assignment</b>               |
|--------------------------------------|--------------------------------------------|
| 330                                  | in-plane Ph–C <sup>+</sup> –Ph bending     |
| 433                                  | out-of-plane Ph–C <sup>+</sup> –Ph bending |
| 519                                  | ring skeletal vib radical orientation      |
| 554                                  | ring skeletal vib radical orientation      |
| 718                                  | out-of-plane ring C–H bending              |
| 753                                  | out-of-plane ring C–H bending              |
| 799                                  | out-of-plane ring C–H bending              |
| 907                                  | ring skeletal vib radical orientation      |
| 935                                  | ring skeletal vib radical orientation      |
| 1168                                 | in-plane ring C–H bending                  |
| 1293                                 | ring C–C stretching                        |
| 1363                                 | N-phenyl stretching                        |
| 1532                                 | ring C–C stretching                        |
| 1580                                 | ring C–C stretching                        |
| 1613                                 | ring C–C stretching                        |

### **Reference**

- 3 E. J. Liang, X. L. Ye, W. Kiefer, *J. Phys. Chem. A*, 1997, **101**, 7330.
